# Supplementary material for: Embryonic Thermal Manipulation Affects the Antioxidant Response to Post-Hatch Thermal Exposure in Broiler Chickens
Source: PubMed Central journal article supplement (PMC7022970; doi:10.3390/ani10010126), 2020-01-13
Supplement: animals-10-00126-s001.pdf [file animals-10-00126-s001.pdf]

# Embryonic Thermal Manipulation Affects the Antioxidant Response to Post-Hatch Thermal Exposure in Broiler Chickens

Khaled M. M. Saleh <sup>1</sup>, Amneh H. Tarkhan <sup>1</sup> and Mohammad Borhan Al-Zghoul <sup>2,\*</sup>

Table 1. effects of heat stress on the hepatic mRNA levels of certain antioxidant enzymes in broiler chickens subjected to embryonic TM.

| Liver           | Control                   |                           | TM                        |                           |
|-----------------|---------------------------|---------------------------|---------------------------|---------------------------|
|                 | TN                        | CHS                       | TN                        | CHS                       |
| <b>NOX4</b>     |                           |                           |                           |                           |
| Day 0           | 1.00 ± 0.20 <sup>aw</sup> | 1.03 ± 0.20 <sup>aw</sup> | 1.09 ± 0.10 <sup>ax</sup> | 1.13 ± 0.10 <sup>aw</sup> |
| Day 1           | 1.03 ± 0.17 <sup>aw</sup> | 2.21 ± 0.37 <sup>bx</sup> | 1.13 ± 0.13 <sup>ax</sup> | 2.39 ± 0.35 <sup>bx</sup> |
| Day 3           | 1.01 ± 0.14 <sup>aw</sup> | 6.09 ± 1.26 <sup>by</sup> | 1.03 ± 0.10 <sup>ax</sup> | 1.78 ± 0.46 <sup>cx</sup> |
| Day 5           | 1.02 ± 0.10 <sup>aw</sup> | 5.04 ± 2.37 <sup>by</sup> | 1.08 ± 0.10 <sup>ax</sup> | 1.4 ± 0.14 <sup>cx</sup>  |
| Day 7           | 1.01 ± 0.20 <sup>aw</sup> | 8.63 ± 4.41 <sup>by</sup> | 1.15 ± 0.10 <sup>ax</sup> | 1.51 ± 0.31 <sup>cx</sup> |
| <b>SOD</b>      | <b>control</b>            | <b>TM</b>                 | <b>control</b>            | <b>TM</b>                 |
| Day 0           | 1.00 ± 0.12 <sup>aw</sup> | 1.05 ± 0.42 <sup>aw</sup> | 0.64 ± 0.13 <sup>ax</sup> | 0.64 ± 0.13 <sup>aw</sup> |
| Day 1           | 1.11 ± 0.32 <sup>aw</sup> | 1.90 ± 0.17 <sup>bx</sup> | 0.67 ± 0.11 <sup>ax</sup> | 1.68 ± 0.79 <sup>cx</sup> |
| Day 3           | 1.11 ± 0.42 <sup>aw</sup> | 1.76 ± 0.39 <sup>bx</sup> | 0.54 ± 0.13 <sup>ax</sup> | 0.17 ± 0.07 <sup>cy</sup> |
| Day 5           | 1.09 ± 0.22 <sup>aw</sup> | 1.86 ± 0.08 <sup>bx</sup> | 0.69 ± 0.14 <sup>ax</sup> | 0.91 ± 0.15 <sup>aw</sup> |
| Day 7           | 0.97 ± 0.42 <sup>aw</sup> | 3.5 ± 1.50 <sup>bx</sup>  | 0.64 ± 0.17 <sup>ax</sup> | 0.8 ± 0.12 <sup>aw</sup>  |
| <b>Catalase</b> | <b>TN</b>                 | <b>CHS</b>                | <b>TN</b>                 | <b>CHS</b>                |
| Day 0           | 1.00 ± 0.23 <sup>aw</sup> | 1.03 ± 0.33 <sup>aw</sup> | 0.47 ± 0.23 <sup>bw</sup> | 0.37 ± 0.23 <sup>bw</sup> |
| Day 1           | 1.13 ± 0.33 <sup>aw</sup> | 2.54 ± 0.29 <sup>bx</sup> | 0.39 ± 0.19 <sup>cw</sup> | 2.23 ± 0.86 <sup>ax</sup> |
| Day 3           | 0.93 ± 0.22 <sup>aw</sup> | 1.65 ± 0.37 <sup>by</sup> | 0.47 ± 0.19 <sup>cw</sup> | 0.91 ± 0.14 <sup>aw</sup> |
| Day 5           | 1.03 ± 0.14 <sup>aw</sup> | 3.98 ± 0.14 <sup>bx</sup> | 0.42 ± 0.23 <sup>cw</sup> | 0.75 ± 0.25 <sup>cw</sup> |
| Day 7           | 1.13 ± 0.29 <sup>aw</sup> | 2.70 ± 1.00 <sup>bx</sup> | 0.51 ± 0.23 <sup>cw</sup> | 0.94 ± 0.08 <sup>aw</sup> |

Control: control group, TM: thermal manipulated group, TN: Thermoneutral, CHS: chronic heat, NOX4: NADPH oxidase 4 SOD: superoxide dismutase 2.

<sup>a-c</sup> within same row, mean ±SD with different superscript differ significantly (p-value < 0.05)

<sup>w-z</sup> within same treatment column, mean ±SD with different superscript differ significantly (p-value < 0.05)

**Table S2: effects of heat stress on the splenic mRNA levels of certain antioxidant enzymes in broiler chickens subjected to embryonic TM.**

| Spleen       | Control                   |                            | TM                        |                           |
|--------------|---------------------------|----------------------------|---------------------------|---------------------------|
|              | NOX4                      | TN                         | CHS                       | TN                        |
| <b>Day 0</b> | 1.00 ± 0.23 <sup>aw</sup> | 1.13 ± 0.38 <sup>bw</sup>  | 2.01 ± 1.01 <sup>aw</sup> | 2.21 ± 1.51 <sup>aw</sup> |
| <b>Day 1</b> | 1.03 ± 0.27 <sup>aw</sup> | 0.62 ± 0.11 <sup>bw</sup>  | 1.99 ± 1.05 <sup>aw</sup> | 0.47 ± 0.13 <sup>bx</sup> |
| <b>Day 3</b> | 1.03 ± 0.33 <sup>aw</sup> | 0.45 ± 0.09 <sup>aw</sup>  | 1.75 ± 1.51 <sup>aw</sup> | 0.56 ± 0.06 <sup>ax</sup> |
| <b>Day 5</b> | 1.03 ± 0.23 <sup>aw</sup> | 2.9 ± 1.05 <sup>bx</sup>   | 2.03 ± 1.11 <sup>aw</sup> | 0.61 ± 0.05 <sup>cx</sup> |
| <b>Day 7</b> | 1.17 ± 0.23 <sup>aw</sup> | 1.09 ± 0.41 <sup>ay</sup>  | 2.31 ± 1.21 <sup>aw</sup> | 0.39 ± 0.14 <sup>bx</sup> |
| SOD          | TN                        | CHS                        | control                   | TM                        |
| <b>Day 0</b> | 1.00 ± 0.23 <sup>aw</sup> | 1.03 ± 0.46 <sup>aw</sup>  | 0.86 ± 0.33 <sup>aw</sup> | 0.86 ± 0.65 <sup>aw</sup> |
| <b>Day 1</b> | 1.17 ± 0.23 <sup>aw</sup> | 1.52 ± 1.04 <sup>ax</sup>  | 0.89 ± 0.55 <sup>aw</sup> | 1.77 ± 0.93 <sup>ax</sup> |
| <b>Day 3</b> | 1.03 ± 0.27 <sup>aw</sup> | 2.39 ± 0.24 <sup>cy</sup>  | 0.75 ± 0.45 <sup>aw</sup> | 1.54 ± 0.2 <sup>bx</sup>  |
| <b>Day 5</b> | 1.03 ± 0.33 <sup>aw</sup> | 2.98 ± 0.84 <sup>by</sup>  | 0.86 ± 0.35 <sup>aw</sup> | 3.53 ± 0.85 <sup>by</sup> |
| <b>Day 7</b> | 1.13 ± 0.25 <sup>aw</sup> | 4.15 ± 0.96 <sup>bz</sup>  | 0.90 ± 0.55 <sup>aw</sup> | 1.42 ± 0.39 <sup>ax</sup> |
| Catalase     | TN                        | CHS                        | TN                        | CHS                       |
| <b>Day 0</b> | 1.00 ± 0.27 <sup>aw</sup> | 1.04 ± 0.45 <sup>aw</sup>  | 1.45 ± 1.13 <sup>aw</sup> | 1.45 ± 1.13 <sup>aw</sup> |
| <b>Day 1</b> | 1.03 ± 0.33 <sup>aw</sup> | 6.4 ± 1.85 <sup>bx</sup>   | 1.35 ± 1.33 <sup>aw</sup> | 1.59 ± 1.11 <sup>aw</sup> |
| <b>Day 3</b> | 1.13 ± 0.23 <sup>aw</sup> | 2.09 ± 0.21 <sup>ay</sup>  | 1.45 ± 0.97 <sup>aw</sup> | 5.71 ± 1.39 <sup>ax</sup> |
| <b>Day 5</b> | 1.07 ± 0.27 <sup>aw</sup> | 6.81 ± 0.22 <sup>ax</sup>  | 1.55 ± 0.87 <sup>aw</sup> | 5.58 ± 1.16 <sup>ax</sup> |
| <b>Day 7</b> | 1.09 ± 0.21 <sup>aw</sup> | 15.54 ± 6.85 <sup>az</sup> | 1.15 ± 1.23 <sup>aw</sup> | 2.21 ± 1.65 <sup>aw</sup> |

Control: control group, TM: thermal manipulated group, TN: Thermoneutral, CHS: chronic heat, NOX4: NADPH oxidase 4 SOD: superoxide dismutase 2.

a-c within same row, mean ±SD with different superscript differ significantly (p-value < 0.05)

w-z within same treatment column, mean ±SD with different superscript differ significantly (p-value < 0.05)
